# Supplementary material for: Extended Near-Infrared Photoactivity of Bi6Fe1.9Co0.1Ti3O18 by Upconversion Nanoparticles
Source: MDPI journal article supplement (doi:10.3390/nano8070534), 2018-07-16
Supplement: s1 [file s1]

## Supplementary Materials

### Extended Near-Infrared Photoactivity of $\text{Bi}_6\text{Fe}_{1.9}\text{Co}_{0.1}\text{Ti}_3\text{O}_{18}$ by Upconversion Nanoparticles

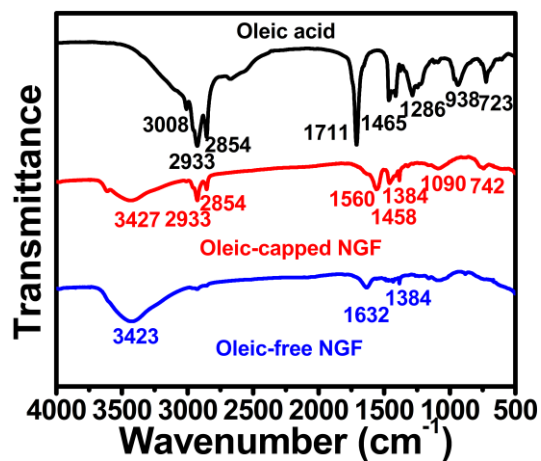

**Figure S1.** The FT-IR spectra of oleic acid, oleic-capped NGF and oleic-free NGF nanoparticles.
